# Supplementary material for: Removal of methyl red from wastewater using a NiO@Hyphaene thebaicaseed-derived porous carbon adsorbent: kinetics and isotherm studies
Source: Royal Society of Chemistry journal article supplement (doi:10.1039/d3ma00226h), 2023-01-01
Supplement: d3ma00226h1.pdf [file d3ma00226h1.pdf]

## Supplementary Information

### **Removal of Methyl Red from wastewater by NiO@Hyphaene Thebaica seeds-derived porous carbon adsorbent: Kinetics, and isotherm studies**

Abdelaal S. A. Ahmed<sup>1\*</sup>, Ahmed Kotb<sup>1</sup>, Moustafa M. S. Sanad<sup>2</sup>, Mohamed H. Abdallah<sup>1</sup>, Ahmed N. R. M. Negm<sup>1</sup>,

<sup>1</sup> Chemistry Department, Faculty of Science, Al-Azhar University, Assiut 71524, Egypt

<sup>2</sup> Central Metallurgical Research and Development Institute, P.O. Box 87 Helwan, 11421, Cairo, Egypt

Corresponding author E-mail [abdelaalsaiyd@gmail.com](mailto:abdelaalsaiyd@gmail.com); [abdelaalsaiyd@azhar.edu.eg](mailto:abdelaalsaiyd@azhar.edu.eg)

#### **1 Materials and reagents**

Ammonium hydroxide (NH<sub>4</sub>OH) and nickel nitrate hexahydrate (Ni(NO<sub>3</sub>)<sub>2</sub>·6H<sub>2</sub>O) were purchased from Aladdin Chemicals Co. Ltd (Shanghai). Methyl red (C<sub>15</sub>H<sub>15</sub>N<sub>3</sub>O<sub>2</sub>) from Sigma-Aldrich. Ethanol absolute (C<sub>2</sub>H<sub>6</sub>O) from Sinopharm Chemical Reagent Co., Ltd.

#### **2 Characterization and measurements.**

A Bruker D8 Advance X-ray diffractometer operating at 40 kV with Cu K radiation (0.154 nm) was used to acquire XRD patterns of the produced materials. Fourier transform infrared (FT-IR) spectra were acquired using an infrared spectrometric analyzer and the KBr pellet technique at a wavenumber in the range of 4000 - 400 cm<sup>-1</sup>. Transmission electron microscopy (TEM) and images were taken by JEM-2100F field emission microscope (JEOL Ltd., Japan) with an accelerating voltage of 200 kV. A JEOL 2100F microscope was used to take high-resolution transmission electron microscopy (HR-TEM) and selected area electron diffraction

(SAED) patterns. A Micromeritics ASAP 2020 HD88 surface area analyzer used to obtain Nitrogen adsorption-desorption isotherms at -196

| Initial MR concentration (mg/L) | R (%)        | Qe(mg/g) | R (%)                      | Qe(mg/g) |
|---------------------------------|--------------|----------|----------------------------|----------|
|                                 | HT-derived C |          | NiO@HT-derived C composite |          |

°C. The samples were degassed in vacuum at 393K for 24 h before the measurement. Brunauer-Emmett-Teller (BET) and Barret-Joyner-Halenda (BJH) methods were used to determine specific surface areas, mesoporous, and micropore parameter values, respectively. X-ray photoelectron spectroscopy (XPS) spectra were obtained using 300 W Al K radiation and an ESCALab220i-XL electron spectrometer (VG Scientific).

### 3 BET surface area

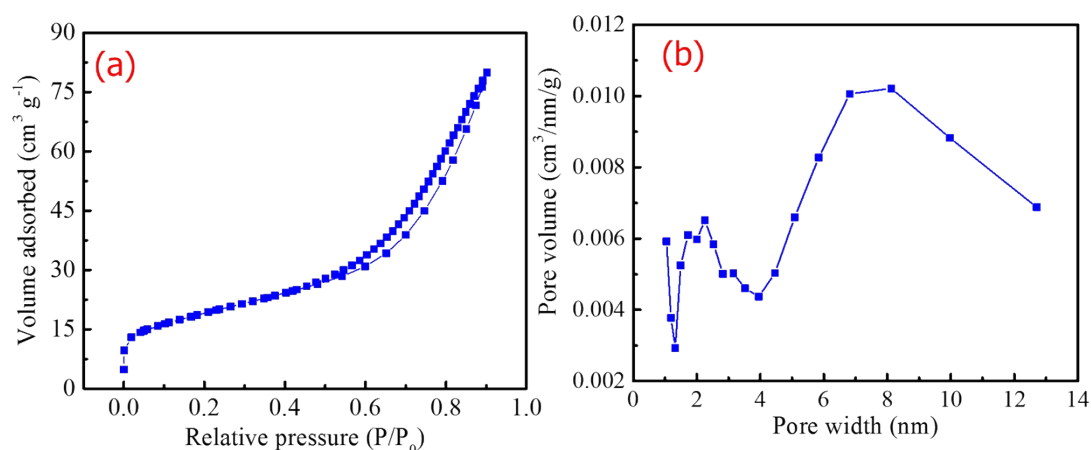

Figure S1: (a) N<sub>2</sub> adsorption-desorption isotherms, and (b) pore size distribution of NiO@HT derived C composite.

|     |       |       |       |        |
|-----|-------|-------|-------|--------|
| 10  | 90.78 | 6.57  | 94.69 | 7.89   |
| 30  | 86.27 | 22.40 | 93.63 | 23.14  |
| 50  | 82.33 | 36.80 | 93.33 | 38.89  |
| 70  | 81.54 | 47.56 | 91.54 | 53.40  |
| 90  | 79.62 | 58.05 | 90.73 | 68.05  |
| 100 | 71.60 | 56.33 | 88.59 | 73.83  |
| 120 | 69.70 | 66.36 | 86.36 | 86.36  |
| 150 | 66.26 | 82.82 | 84.26 | 105.32 |
| 170 | 61.62 | 83.33 | 79.24 | 112.30 |
| 200 | 57.20 | 83.44 | 67.70 | 112.84 |

**Table S1:** Effect of initial MR concentration on the removal percentage and adsorption capacity.
